# Supplementary material for: GIS, Multivariate Statistics Analysis and Health Risk Assessment of Water Supply Quality for Human Use in Central Mexico
Source: MDPI journal article supplement (doi:10.3390/w13162196), 2021-08-11

## *Supplementary material*

# GIS, Multivariate Statistics Analysis and Health Risk Assessment of Water Supply Quality for Human Use in Central Mexico

Leonel Hernández-Mena <sup>1</sup>, María Guadalupe Panduro-Rivera <sup>1</sup>, José de Jesús Díaz-Torres <sup>1</sup>, Valeria Ojeda-Castillo <sup>1,2</sup>, Jorge del Real-Olvera <sup>1</sup>, Malaquías López-Cervantes <sup>3</sup>, Reyna Lizette Pacheco-Domínguez <sup>3</sup>, Ofelia Morton-Bermea <sup>4</sup>, Rogelio Santacruz-Benítez <sup>3</sup>, Ramiro Vallejo-Rodríguez <sup>1</sup>, Daryl Rafael Osuna-Laveaga <sup>5</sup>, Erick R. Bandala <sup>6</sup>, and Valentín Flores-Payán <sup>1,7\*</sup>

<sup>1</sup> Unidad de Tecnología Ambiental, Centro de Investigación y Asistencia en Tecnología y Diseño del Estado de Jalisco A.C. (CIATEJ), Av. Normalistas #800, Guadalajara, 44270, Mexico; lhernandez@ciatej.mx (L.H.M.); mdgpr\_26@hotmail.com (M.G.P.R.); jdiaz@ciatej.mx (J.J.D.T.); jdelreal@ciatej.mx (J.R.O.); rvallejo@ciatej.mx (R.V.R.)

<sup>2</sup> División de Energías Renovables; Tecnológico de Estudios Superiores de San Felipe del Progreso, Av. Instituto Tecnológico S/N, Ejido de San Felipe del Progreso, San Felipe del Progreso 50640, Mexico; valeria.oc@sfelipeprogreso.tecnm.mx (V.O.C.);

<sup>3</sup> School of Medicine, Unit of Special Sociomedical Research Projects, National Autonomous University of Mexico, University City, Coyoacán, 04510, Mexico; mlopez14@unam.mx (M.L.C.); lirey@unam.mx (R.L.P.D.); rsantacruzbenitez@gmail.com (R.S.B.)

<sup>4</sup> Geophysics Institute, ICP-MS Laboratory, National Autonomous University of Mexico, University City, Coyoacán, 04510, Mexico; omorton@geofisica.unam.mx (O.M.B.)

<sup>5</sup> Departamento de Ciencias Biotecnológicas y Ambientales, Universidad Autónoma de Guadalajara, AC. Av. Patria 1201, Lomas del Valle, Zapopan, 45129, Mexico; ibt.drol@gmail.com (D.R.O.L.)

<sup>6</sup> Division of Hydrologic Sciences, Desert Research Institute, 755 E. Flamingo Road, Las Vegas, NV 89119-7363, USA. Erick.Bandala@dri.edu (E.R.B.)

<sup>7</sup> Centro Universitario de Tonalá, Universidad de Guadalajara, Av. Nuevo Periférico No. 555 Ejido San José Tateposco, Tonalá, 48525, Mexico; vfpayan@gmail.com (V.F.P.)

\* Correspondence: vfpayan@gmail.com (V.F.P.); lhernandez@ciatej.mx (L.H.M.); Tel.: +52-333-345-5200

**Table S1.** The geographic location of municipalities in the eastern region of Michoacán-Mexico

| Municipality name | Acronym | Geographical coordinates      | M.A.S.L. |
|-------------------|---------|-------------------------------|----------|
| Zinapécuaro       | ZIN     | 19° 52' 15" N; 100° 50' 06" W | 2,463    |
| Ciudad Hidalgo    | HID     | 19° 41' 32" N; 100° 33' 26" W | 2,060    |
| San Pedro Jácharo | SPJ     | 19° 42' 52" N; 100° 38' 41" W | 2,160    |
| Maravatío         | MAR     | 19° 53' 36" N; 100° 26' 34" W | 2,020    |
| Irimbo            | IRI     | 19° 42' 00" N; 100° 28' 42" W | 2,150    |
| Zitácuaro         | ZIT     | 19° 26' 17" N; 100° 21' 32" W | 1,942    |
| Tuxpan            | TUX     | 19° 34' 00" N; 100° 27' 46" W | 1,726    |

**Table S2.** Water quality parameters, methods and equipment used in laboratory determination [18]

| Parameter                                                                                                                                                                                                                                                                                                                           | Analytical Method                                                                          | Equipment                                                                                 |
|-------------------------------------------------------------------------------------------------------------------------------------------------------------------------------------------------------------------------------------------------------------------------------------------------------------------------------------|--------------------------------------------------------------------------------------------|-------------------------------------------------------------------------------------------|
| Turbidity                                                                                                                                                                                                                                                                                                                           | 2130B. Nephelometric                                                                       | HACH Turbidimeter 2100 ANIS                                                               |
| Color                                                                                                                                                                                                                                                                                                                               | 2120C. Spectrophotometric                                                                  | HACH Spectrophotometer DR 2800                                                            |
| Acidity                                                                                                                                                                                                                                                                                                                             | 2310B. Titration                                                                           | NA <sup>d</sup>                                                                           |
| Alkalinity                                                                                                                                                                                                                                                                                                                          | 2310B. Titration                                                                           | NA <sup>d</sup>                                                                           |
| Hardness                                                                                                                                                                                                                                                                                                                            | 2340B. Calculated by Ca <sup>+2</sup> and Mg <sup>+2</sup>                                 | NA <sup>d</sup>                                                                           |
| COD <sup>a</sup>                                                                                                                                                                                                                                                                                                                    | 5220D. Closed-reflux Colorimetric                                                          | HACH Digester DR 8200                                                                     |
| BOD <sup>b</sup>                                                                                                                                                                                                                                                                                                                    | 5210D. Respirometric                                                                       | BOD analyzer Trak (HACH) with incubator                                                   |
| Cations/Anions:<br>Li <sup>+</sup> , Na <sup>+</sup> , NH <sub>4</sub> <sup>+</sup> , K <sup>+</sup> ,<br>Ca <sup>+2</sup> , Mg <sup>+2</sup> , F <sup>-</sup> , Cl <sup>-</sup> ,<br>NO <sub>2</sub> <sup>-</sup> , Br <sup>-</sup> , NO <sub>3</sub> <sup>-</sup> , PO <sub>4</sub> <sup>-3</sup> , SO <sub>4</sub> <sup>-2</sup> | 4110 B. (anions)/ASTM D 6919-03<br>(cations). Chromatographic: external<br>standard method | Ion chromatograph, Metrohm 861.<br>Advanced Compact Model with a<br>conductivity detector |
| Metals and toxic<br>elements: Ba, Cr,<br>Fe, Cu, Zn, Cd, Al,<br>Pb, As, Sb, Mn, Co,<br>Ni, Se                                                                                                                                                                                                                                       | 3125B. ICP-MS <sup>c</sup>                                                                 | Perkin Elmer ELAN 9000 ICP-MS <sup>c</sup>                                                |

<sup>a</sup> COD: Chemical Oxygen Demand; <sup>b</sup> BOD: Biochemical Oxygen Demand; <sup>c</sup> ICP-MS: Inductively Coupled Plasma-Mass Spectrometry; <sup>d</sup> NA: No Applycate

**Table S3.** Negative effects on human health of parameters employed in the WQI.

| Parameter                      | Effects on human health                                                                                                                                                                                                                                                                                                                                                                                                                                        |
|--------------------------------|----------------------------------------------------------------------------------------------------------------------------------------------------------------------------------------------------------------------------------------------------------------------------------------------------------------------------------------------------------------------------------------------------------------------------------------------------------------|
| <b>pH<sup>1</sup></b>          | Below pH 4.0, induce redness and irritation of the eyes. Below pH 2.5, damage in epithelium is irreversible and extensive. Furthermore, pH can affect the degree of corrosion of metals as well as disinfection efficiency; it may have an indirect effect on health.                                                                                                                                                                                          |
| <b>EC<sup>2</sup></b>          | Electric conductivity have a relation with Total Dissolved Solids (TDS) or inorganic salts present in water. High levels of TDS may be objectionable to consumers owing to the resulting taste and to excessive scaling in water pipes, heaters, boilers, and household appliances. TDS in low concentrations could be unacceptable to consumers because of its flat, insipid taste; it is also often corrosive to water-supply systems.                       |
| <b>Temperature<sup>3</sup></b> | Cool water is generally more palatable than warm water, and temperature will impact the acceptability of a number of other inorganic constituents and chemical contaminants that may affect taste. High water temperature enhances the growth of microorganisms and may increase taste, odour, colour and corrosion problems (indirect effect on human health).                                                                                                |
| <b>Sodium<sup>4</sup></b>      | Acute effects may include nausea, vomiting, convulsions, muscular twitching and rigidity, and cerebral and pulmonary oedema. Aggravates chronic congestive heart failure, and ill effects due to high levels of sodium in drinking water. In infants induce severe gastrointestinal infections from fluid loss, leading to dehydration and raised sodium levels in the plasma (hypernatraemia); permanent neurological damage is common under such conditions. |
| <b>Calcium<sup>5,6</sup></b>   | High calcium levels contribute to hard water. Hard water could provide an important supplementary contribution to total calcium intake. Inadequate intakes of calcium have been associated with increased risks of osteoporosis, nephrolithiasis (kidney stones), colorectal cancer, hypertension, etc.                                                                                                                                                        |
| <b>Magnesium<sup>5,6</sup></b> | High magnesium levels contribute to hard water. Hard water could provide an important supplementary contribution to total magnesium intake. Magnesium in high concentration (250 mg/L) can have a laxative effect.                                                                                                                                                                                                                                             |

|                               |                                                                                                                                                                                                                                                                                                                                                                                                                                                                                                                                                                                                                                                                  |
|-------------------------------|------------------------------------------------------------------------------------------------------------------------------------------------------------------------------------------------------------------------------------------------------------------------------------------------------------------------------------------------------------------------------------------------------------------------------------------------------------------------------------------------------------------------------------------------------------------------------------------------------------------------------------------------------------------|
|                               | Low magnesium levels are associated with endothelial dysfunction, increased vascular reactions, decreased insulin sensitivity, hypertension, coronary heart disease, type 2 diabetes mellitus and metabolic syndrome.                                                                                                                                                                                                                                                                                                                                                                                                                                            |
| <b>Chloride<sup>7</sup></b>   | Chloride toxicity has not been observed in humans except in the special case of impaired sodium chloride metabolism, e.g. in congestive heart failure. Little is known about the effect of prolonged intake of large amounts of chloride in the diet. Hypertension associated with sodium chloride intake appears to be related to the sodium rather than the chloride ion.                                                                                                                                                                                                                                                                                      |
| <b>Nitrate<sup>8</sup></b>    | The exposure risk to nitrate is by their reduction in nitrite. Nitrate could induce methaemoglobinaemia, carcinogenicity, congenital malformations in some case, cardiovascular effects, and effect on thyroid function and goiter incidence.                                                                                                                                                                                                                                                                                                                                                                                                                    |
| <b>Sulfate<sup>9</sup></b>    | Cathartic effects in people consuming drinking water containing sulfate, dehydration are a common side-effect following the ingestion of large amounts of magnesium or sodium sulfate. Children, transients and the elderly are sensitive populations because of the potentially high risk of dehydration from diarrhea by high levels of sulfate in drinking water.                                                                                                                                                                                                                                                                                             |
| <b>Chromium<sup>10</sup></b>  | Acute tubular necrosis, <u>asthma</u> —allergen, sensitizer, bronchitis—acute, contact dermatitis—irritant, lung <u>cancer</u> , nasal polyps, nasal septal perforation, pneumonitis (hypersensitivity), rhinitis—allergic, skin ulceration, brain <u>cancer</u> —adult, chronic renal disease, etc.                                                                                                                                                                                                                                                                                                                                                             |
| <b>Lead<sup>10</sup></b>      | <u>Abnormal sperm (morphology, motility, and sperm count)</u> , acute tubular necrosis, hyperactivity, anemia (including hemolytic), behavioral problems, cataracts, chronic renal disease, <u>cognitive impairment (includes impaired learning, impaired memory, and decreased attention span/mental retardation/developmental delay)</u> , etc.                                                                                                                                                                                                                                                                                                                |
| <b>Arsenic<sup>10</sup></b>   | <u>Angiosarcoma</u> (hepatic), arrhythmias, bladder <u>cancer</u> , contact dermatitis—irritant, <u>diabetes—Type II</u> , hearing loss, hyperkeratosis/hyperpigmentation, lung <u>cancer</u> , peripheral neuropathy, skin <u>cancer</u> (non-melanoma), skin ulceration, adult-onset <u>leukemias</u> , anemia (including hemolytic), aplastic anemia. Bronchitis—chronic, <u>cardiomyopathy</u> , cirrhosis, <u>congenital malformations—general</u> , <u>coronary artery disease (peripheral vascular disease, atherosclerosis)</u> , <u>fetotoxicity (miscarriage/spontaneous abortion, stillbirth)</u> , hepatocellular <u>cancer</u> (liver cancer), etc. |
| <b>Manganese<sup>11</sup></b> | The progressive increases in the manganese concentration in drinking water are associated with a progressively higher prevalence of neurological signs of chronic manganese poisoning and higher manganese concentrations in the hair of older persons.                                                                                                                                                                                                                                                                                                                                                                                                          |

<sup>1</sup>WHO, 2003. *pH in Drinking-water, Background document for development of WHO Guidelines for Drinking-water Quality*. World Health Organization (WHO). Originally published in *Guidelines for drinking-water quality*, 2nd ed. Vol. 2. Health criteria and other supporting information. World Health Organization, Geneva, 1996.

<sup>2</sup>WHO, 2003. *Total dissolved solids in Drinking-water, Background document for development of WHO Guidelines for Drinking-water Quality*. World Health Organization (WHO). Originally published in *Guidelines for drinking-water quality*, 2nd ed. Vol. 2. Health criteria and other supporting information. World Health Organization, Geneva, 1996.

<sup>3</sup>WHO, 2011. *Guidelines for Drinking-water Quality*. World Health Organization (WHO). 4<sup>a</sup> edition. ISBN 978 92 4 154815 1.

<sup>4</sup>WHO, 2003. *Sodium in Drinking-water Background document for development of WHO Guidelines for Drinking-water Quality*. World Health Organization (WHO). Originally published in *Guidelines for drinking-water quality*, 2nd ed. Vol. 2. Health criteria and other supporting information. World Health Organization, Geneva, 1996.

<sup>5</sup>WHO, 2009. *Calcium and Magnesium in Drinking-water: Public health significance*. World Health Organization (WHO). 1a edition. ISBN 978 92 4 156355 0.

<sup>6</sup>Sengupta, P. (2013). Potential health impacts of hard water. *International Journal of Preventive Medicine*. 4(8): 866-875.

<sup>7</sup>WHO, 2003. *Chloride in Drinking-water Background document for development WHO Guidelines for Drinking-water Quality*. World Health Organization (WHO). Originally published in *Guidelines for drinking-water quality*, 2nd ed. Vol. 2. Health criteria and other supporting information. World Health Organization, Geneva, 1996.

<sup>8</sup>WHO, 2011. *Nitrate and Nitrite in Drinking-water Background document for development of WHO Guidelines for Drinking-water Quality*. World Health Organization (WHO).

<sup>9</sup>WHO, 2004. *Sulfate in Drinking-water Background document for development of WHO Guidelines for Drinking-water Quality*. World Health Organization (WHO).

<sup>10</sup><https://www.healthandenvironment.org/environmental-health/environmental-risks/global-environment/water-quality>

<sup>11</sup>WHO, 2010. *Aluminium in Drinking-water Background document for development of WHO Guidelines for Drinking-water Quality*. World Health Organization (WHO).

Table S4. Descriptive statistics for water quality parameters during dry season

|                               |   | ZIN    |        |    | HID    |        |    | SPJ    |        |   | MAR    |       |   | IRI    |       |   | ZIT    |       |    | TUX    |        |
|-------------------------------|---|--------|--------|----|--------|--------|----|--------|--------|---|--------|-------|---|--------|-------|---|--------|-------|----|--------|--------|
|                               | n | Mean   | SD     | n  | Mean   | SD     | n  | Mean   | SD     | n | Mean   | SD    | n | Mean   | SD    | n | Mean   | SD    | n  | Mean   | SD     |
| pH                            | 8 | 7.23   | 0.24   | 17 | 7.25   | 0.34   | 13 | 5.35   | 0.90   | 5 | 6.71   | 0.21  | 6 | 6.60   | 0.12  | 9 | 6.59   | 0.11  | 10 | 6.69   | 0.21   |
| EC                            | 8 | 286.75 | 179.62 | 17 | 216.06 | 108.71 | 13 | 272.45 | 110.25 | 5 | 255.60 | 13.01 | 6 | 198.33 | 33.57 | 9 | 211.89 | 64.22 | 10 | 265.70 | 157.96 |
| Temperature                   | 8 | 26.69  | 5.18   | 17 | 19.14  | 2.15   | 13 | 18.04  | 3.05   | 5 | 23.56  | 2.14  | 6 | 20.45  | 2.06  | 9 | 19.96  | 1.00  | 10 | 19.57  | 1.51   |
| TDS                           | 8 | 142.50 | 88.68  | 17 | 108.06 | 54.23  | 13 | 137.08 | 54.40  | 5 | 127.60 | 6.47  | 6 | 99.17  | 16.75 | 9 | 105.89 | 32.00 | 10 | 146.80 | 87.88  |
| DO                            | 8 | 4.46   | 1.28   | 17 | 5.41   | 1.16   | 13 | ND     | --     | 5 | 4.88   | 0.75  | 6 | 4.16   | 0.45  | 9 | 5.75   | 1.82  | 10 | 5.90   | 2.00   |
| Turbidity                     | 8 | 0.33   | 0.26   | 17 | 0.65   | 0.61   | 13 | 0.64   | 0.68   | 5 | 0.29   | 0.32  | 6 | 3.17   | 2.91  | 9 | 1.61   | 1.02  | 10 | 6.87   | 15.47  |
| Color                         | 8 | 16.75  | 17.21  | 15 | 7.87   | 5.57   | 13 | 9.00   | 10.74  | 4 | 2.50   | 1.73  | 6 | 24.50  | 20.75 | 9 | 10.00  | 4.03  | 10 | 29.70  | 37.15  |
| Acidity                       | 8 | 9.42   | 3.99   | 17 | 8.13   | 5.83   | 13 | 27.31  | 19.22  | 5 | 5.06   | 1.77  | 6 | 3.24   | 1.26  | 9 | 3.62   | 1.32  | 10 | 4.26   | 1.69   |
| Alkalinity                    | 8 | 102.18 | 36.35  | 17 | 110.88 | 55.05  | 13 | 128.46 | 48.28  | 5 | 125.50 | 8.02  | 6 | 79.67  | 27.59 | 9 | 91.72  | 27.86 | 10 | 132.26 | 95.29  |
| Hardness                      | 8 | 66.41  | 45.46  | 17 | 91.57  | 51.70  | 13 | ND     | --     | 5 | 81.55  | 2.54  | 6 | 65.04  | 10.53 | 9 | 84.08  | 22.84 | 10 | 121.87 | 74.11  |
| COD                           | 8 | 3.96   | 3.20   | 2  | 2.85   | 3.18   | 8  | 33.40  | 85.85  | 5 | B.D.L. | --    | 3 | 1.27   | 1.42  | 9 | 3.18   | 1.49  | 10 | 3.32   | 2.52   |
| BOD <sub>5</sub>              | 8 | ND     | --     | 17 | ND     | --     | 1  | 5.20   | --     | 5 | B.D.L. | --    | 6 | B.D.L. | --    | 0 | B.D.L. | --    | 1  | 2.20   | --     |
| Li <sup>+</sup>               | 8 | B.D.L. | --     | 17 | B.D.L. | --     | 13 | B.D.L. | --     | 5 | B.D.L. | --    | 6 | B.D.L. | --    | 9 | B.D.L. | --    | 10 | B.D.L. | --     |
| Na <sup>+</sup>               | 8 | 27.22  | 13.68  | 17 | 14.47  | 5.22   | 13 | 21.20  | 9.02   | 5 | 19.02  | 1.95  | 6 | 12.14  | 3.14  | 9 | 11.86  | 4.93  | 10 | 15.36  | 12.72  |
| NH <sub>4</sub> <sup>+</sup>  | 8 | B.D.L. |        | 17 | B.D.L. | --     | 13 | ND     | --     | 5 | B.D.L. | --    | 6 | B.D.L. | --    | 9 | B.D.L. | --    | 10 | B.D.L. |        |
| K <sup>+</sup>                | 8 | 10.38  | 11.80  | 17 | 4.19   | 2.42   | 13 | 9.55   | 3.88   | 5 | 4.41   | 1.05  | 6 | 3.65   | 1.07  | 9 | 3.43   | 1.16  | 10 | 3.26   | 1.33   |
| Ca <sup>+2</sup>              | 8 | 13.97  | 13.28  | 17 | 15.92  | 9.64   | 13 | 15.34  | 8.58   | 5 | 10.93  | 1.43  | 6 | 11.94  | 1.80  | 9 | 17.19  | 5.15  | 10 | 26.39  | 13.87  |
| Mg <sup>+2</sup>              | 8 | 7.65   | 3.11   | 17 | 12.59  | 7.46   | 13 | 12.09  | 8.24   | 5 | 13.18  | 0.65  | 6 | 8.56   | 1.70  | 9 | 9.99   | 2.49  | 10 | 13.59  | 11.89  |
| F <sup>-</sup>                | 1 | 0.35   | --     | 17 | B.D.L. |        | 13 | ND     | --     | 5 | B.D.L. | --    | 6 | B.D.L. | --    | 9 | B.D.L. | --    | 10 | B.D.L. | --     |
| Cl <sup>-</sup>               | 8 | 7.87   | 12.10  | 17 | 3.45   | 4.11   | 13 | 3.60   | 4.64   | 5 | 2.37   | 0.48  | 6 | 1.40   | 0.62  | 9 | 4.83   | 4.55  | 10 | 2.37   | 1.34   |
| NO <sub>2</sub> <sup>-</sup>  | 8 | B.D.L. | --     | 17 | B.D.L. | --     | 13 | ND     | --     | 5 | B.D.L. | --    | 6 | B.D.L. | --    | 9 | B.D.L. | --    | 10 | B.D.L. | --     |
| Br <sup>-</sup>               | 8 | B.D.L. | --     | 17 | B.D.L. | --     | 13 | ND     | --     | 5 | B.D.L. | --    | 6 | B.D.L. | --    | 9 | B.D.L. | --    | 10 | B.D.L. | --     |
| NO <sub>3</sub> <sup>-</sup>  | 8 | 19.67  | 36.82  | 17 | 9.63   | 12.59  | 13 | ND     | --     | 5 | 4.96   | 2.03  | 6 | 6.28   | 5.55  | 9 | 11.05  | 9.84  | 10 | 6.30   | 8.18   |
| PO <sub>4</sub> <sup>-</sup>  | 2 | 1.06   | 0.55   | 2  | 0.45   | 0.01   | 13 | ND     | --     | 5 | B.D.L. | --    | 6 | B.D.L. | --    | 9 | B.L.D. | --    | 10 | B.D.L. | --     |
| SO <sub>4</sub> <sup>+2</sup> | 7 | 16.05  | 12.43  | 17 | 8.44   | 9.45   | 12 | 27.12  | 15.88  | 5 | 5.04   | 1.39  | 6 | 16.24  | 14.75 | 9 | 8.75   | 6.06  | 7  | 35.54  | 33.09  |
| Ba                            | 8 | 17.43  | 28.00  | 17 | 18.61  | 28.69  | 4  | 0.02   | 0.01   | 5 | 18.89  | 6.53  | 6 | 19.40  | 11.75 | 9 | 23.61  | 38.72 | 10 | 31.99  | 52.02  |
| Cr                            | 8 | 0.29   | 0.16   | 17 | 0.30   | 0.12   | 13 | B.D.L. | --     | 5 | 0.82   | 0.08  | 6 | 1.35   | 1.94  | 9 | 1.59   | 0.61  | 10 | 2.39   | 1.32   |
| Fe                            | 1 | 0.10   | --     | 3  | 0.08   | 0.04   | 13 | 0.12   | 0.21   | 5 | ND     | --    | 6 | ND     | --    | 9 | 64.38  | 21.22 | 10 | 223.39 | 373.70 |
| Cu                            | 8 | 0.93   | 1.14   | 17 | 0.43   | 0.33   | 13 | B.D.L. | --     | 4 | 0.25   | 0.18  | 6 | 0.33   | 0.30  | 9 | 1.37   | 1.11  | 10 | 1.76   | 1.49   |
| Zn                            | 6 | 7.04   | 10.70  | 9  | 31.93  | 76.44  | 2  | 0.02   | 0.01   | 1 | 0.69   | --    | 3 | 0.82   | 0.79  | 9 | 2.29   | 1.30  | 10 | 26.46  | 73.77  |
| Cd                            | 7 | 0.01   | 0.01   | 16 | 0.01   | 0.01   | 13 | B.D.L. | --     | 5 | 0.003  | 0.002 | 5 | 0.002  | 0.001 | 8 | 0.004  | 0.002 | 9  | 0.19   | 0.55   |
| Al                            | 8 | B.D.L. | --     | 1  | 1.10   | --     | 3  | 1.07   | 0.85   | 5 | B.D.L. | --    | 6 | B.D.L. | --    | 8 | 1.01   | 1.47  | 10 | 165.87 | 515.21 |
| Pb                            | 7 | 0.02   | 0.01   | 17 | 0.02   | 0.02   | 13 | B.D.L. | --     | 5 | 0.02   | 0.004 | 6 | 0.03   | 0.02  | 2 | 0.02   | 0.01  | 1  | 15.31  | --     |
| As                            | 8 | 19.68  | 17.04  | 16 | 2.60   | 1.88   | 13 | B.D.L. | --     | 5 | 1.08   | 0.27  | 4 | 0.68   | 0.90  | 9 | 0.85   | 0.65  | 10 | 1.40   | 1.96   |
| Sb                            | 8 | 0.12   | 0.14   | 13 | 0.02   | 0.02   | 14 | B.D.L. | --     | 5 | 0.01   | 0.002 | 4 | 0.02   | 0.02  | 8 | 0.07   | 0.04  | 9  | 0.11   | 0.21   |
| Mn                            | 8 | 0.12   | 0.14   | 13 | 0.02   | 0.02   | 2  | 0.14   | 0.00   | 5 | 0.01   | 0.002 | 4 | 0.02   | 0.02  | 9 | 1.99   | 2.79  | 10 | 110.85 | 325.62 |
| Co                            | 4 | 1.19   | 2.25   | 14 | 8.76   | 28.74  | 13 | B.D.L. | --     | 2 | 0.47   | 0.33  | 5 | 0.39   | 0.70  | 9 | 0.05   | 0.05  | 10 | 0.11   | 0.20   |
| Ni                            | 5 | 0.09   | 0.13   | 17 | 0.06   | 0.05   | 13 | B.D.L. | --     | 5 | 0.01   | 0.005 | 6 | 0.04   | 0.03  | 9 | 0.78   | 0.33  | 10 | 1.26   | 0.65   |
| Se                            | 8 | 0.55   | 0.63   | 17 | 0.59   | 0.67   | 13 | B.D.L. | --     | 5 | 0.42   | 0.22  | 6 | 0.40   | 0.29  | 8 | 0.33   | 0.21  | 8  | 0.29   | 0.18   |

Table S5. Descriptive statistics for water quality parameters during rainy season

|                               |   | ZIN    |        |    | HID    |        |   | SPJ     |         |   | MAR    |       |   | IRI     |         |    | ZIT    |        |    | TUX    |        |
|-------------------------------|---|--------|--------|----|--------|--------|---|---------|---------|---|--------|-------|---|---------|---------|----|--------|--------|----|--------|--------|
|                               | n | Mean   | SD     | n  | Mean   | SD     | n | Mean    | SD      | n | Mean   | SD    | n | Mean    | SD      | n  | Mean   | SD     | n  | Mean   | SD     |
| pH                            | 8 | 6.72   | 0.16   | 14 | 6.91   | 0.33   | 7 | 6.31    | 1.12    | 5 | 7.03   | 0.29  | 6 | 7.14    | 0.34    | 9  | 7.23   | 0.52   | 10 | 7.11   | 0.42   |
| EC                            | 8 | 268.38 | 160.53 | 14 | 238.29 | 109.98 | 7 | 186.86  | 126.42  | 5 | 245.40 | 11.97 | 6 | 211.83  | 56.08   | 9  | 208.67 | 62.70  | 10 | 291.40 | 151.17 |
| Temperature                   | 8 | 26.15  | 5.27   | 14 | 20.28  | 2.11   | 7 | 19.85   | 3.68    | 5 | 23.40  | 2.49  | 6 | 20.63   | 1.42    | 9  | 18.71  | 1.28   | 10 | 19.56  | 1.42   |
| TDS                           | 8 | 134.25 | 80.35  | 14 | 119.29 | 54.93  | 7 | 93.57   | 63.18   | 5 | 122.80 | 6.18  | 6 | 87.50   | 45.91   | 9  | 104.11 | 31.25  | 10 | 145.70 | 75.64  |
| DO                            | 8 | 2.96   | 0.81   | 14 | 3.27   | 1.06   | 7 | 5.20    | 1.11    | 5 | 3.34   | 0.45  | 6 | 4.31    | 0.39    | 9  | 5.80   | 1.20   | 10 | 3.22   | 1.03   |
| Turbidity                     | 8 | 1.18   | 1.52   | 14 | 0.74   | 0.97   | 7 | 22.07   | 35.67   | 5 | 0.44   | 0.65  | 6 | 11.42   | 16.94   | 9  | 0.44   | 0.41   | 10 | 0.64   | 0.85   |
| Color                         | 7 | 11.29  | 9.98   | 8  | 5.25   | 6.10   | 5 | 40.40   | 47.60   | 3 | 5.83   | 6.66  | 5 | 104.80  | 103.53  | 9  | 11.83  | 19.07  | 9  | 4.61   | 5.34   |
| Acidity                       | 8 | 31.09  | 16.45  | 14 | 14.81  | 4.20   | 7 | 20.43   | 25.50   | 5 | 33.85  | 7.66  | 6 | 7.95    | 2.89    | 9  | 14.96  | 2.80   | 10 | 17.64  | 5.70   |
| Alkalinity                    | 8 | 84.12  | 46.05  | 14 | 121.17 | 65.21  | 6 | 89.87   | 72.29   | 5 | 130.94 | 8.04  | 6 | 88.60   | 34.71   | 9  | 107.00 | 24.91  | 10 | 150.02 | 93.48  |
| Hardness                      | 8 | 65.08  | 46.17  | 14 | 93.62  | 53.04  | 5 | 108.89  | 74.44   | 5 | 94.63  | 7.30  | 5 | 54.48   | 44.43   | 9  | 88.30  | 23.49  | 10 | 128.74 | 72.19  |
| COD                           | 7 | 13.20  | 17.08  | 14 | 2.73   | 1.63   | 7 | 7.79    | 5.15    | 4 | 1.93   | 1.51  | 6 | 3.63    | 2.61    | 9  | 3.72   | 1.48   | 10 | 2.87   | 1.00   |
| BOD <sub>5</sub>              | 3 | 10.85  | 11.84  | 14 | B.D.L. | --     | 3 | 0.67    | 0.47    | 5 | ND     | --    | 6 | B.D.L.  | --      | 9  | B.D.L. | --     | 10 | N.D.   | --     |
| Li <sup>+</sup>               | 8 | B.D.L. | --     | 14 | B.D.L. | --     | 1 | 0.16    | --      | 5 | B.D.L. | --    | 6 | B.D.L.  | --      | 9  | B.D.L. | --     | 10 | B.D.L. | --     |
| Na <sup>+</sup>               | 8 | 28.33  | 13.27  | 14 | 15.55  | 6.60   | 6 | 22.59   | 12.88   | 5 | 20.36  | 1.84  | 4 | 13.60   | 6.48    | 9  | 12.27  | 4.54   | 10 | 16.86  | 12.16  |
| NH <sub>4</sub> <sup>+</sup>  | 8 | ND     | --     | 14 | ND     | --     | 7 | B.D.L.  | --      | 5 | ND     | --    | 1 | 6.02    | --      | 1  | 0.18   | --     | 2  | 0.17   | 0.19   |
| K <sup>+</sup>                | 5 | 12.34  | 10.13  | 14 | 3.18   | 1.53   | 6 | 10.83   | 5.40    | 3 | 3.90   | 0.85  | 5 | 6.08    | 6.39    | 9  | 2.25   | 0.97   | 10 | 2.06   | 1.07   |
| Ca <sup>+2</sup>              | 8 | 13.96  | 13.48  | 14 | 15.21  | 8.81   | 6 | 16.47   | 11.59   | 5 | 12.89  | 2.38  | 5 | 12.00   | 5.35    | 9  | 16.85  | 5.19   | 10 | 26.01  | 12.53  |
| Mg <sup>+2</sup>              | 8 | 7.34   | 3.17   | 14 | 13.51  | 8.12   | 5 | 15.03   | 11.26   | 5 | 15.16  | 1.05  | 5 | 10.01   | 5.09    | 9  | 10.57  | 2.73   | 10 | 15.49  | 11.66  |
| F <sup>-</sup>                | 8 | 0.30   | 0.11   | 12 | 0.12   | 0.03   | 1 | 0.22    | --      | 5 | 0.26   | 0.02  | 6 | B.D.L.  | --      | 9  | B.D.L. | --     | 6  | 0.13   | 0.04   |
| Cl <sup>-</sup>               | 8 | 9.81   | 15.02  | 14 | 2.91   | 3.62   | 7 | 4.44    | 8.69    | 5 | 2.96   | 0.79  | 3 | 2.90    | 3.47    | 9  | 4.68   | 4.61   | 10 | 1.96   | 1.37   |
| NO <sub>2</sub> <sup>-</sup>  | 8 | B.D.L. | --     | 14 | ND     | --     | 7 | ND      | --      | 5 | B.L.D. | --    | 6 | B.D.L.  | --      | 9  | B.D.L. | --     | 10 | B.D.L. | --     |
| Br <sup>-</sup>               | 8 | B.D.L. | --     | 14 | ND     | --     | 7 | ND      | --      | 5 | B.L.D. | --    | 6 | B.L.D.  | --      | 90 | B.D.L. | --     | 10 | N.D.   | --     |
| NO <sub>3</sub> <sup>-</sup>  | 8 | 23.12  | 47.53  | 14 | 8.30   | 11.88  | 5 | 0.61    | 0.36    | 5 | 6.30   | 3.03  | 5 | 7.21    | 6.00    | 9  | 12.50  | 12.46  | 10 | 9.63   | 10.38  |
| PO <sub>4</sub> <sup>-</sup>  | 2 | 3.66   | 2.91   | 14 | B.D.L. | --     | 7 | B.D.L.  | --      | 5 | B.L.D. | --    | 6 | B.D.L.  | --      | 9  | B.D.L. | --     | 10 | B.D.L. | --     |
| SO <sub>4</sub> <sup>+2</sup> | 8 | 22.86  | 19.97  | 12 | 8.69   | 9.50   | 7 | 21.91   | 19.45   | 5 | 7.22   | 1.47  | 6 | 17.52   | 23.35   | 9  | 10.04  | 7.85   | 10 | 20.59  | 26.62  |
| Ba                            | 8 | 34.99  | 77.30  | 14 | 33.73  | 64.71  | 7 | 10.89   | 7.94    | 5 | 18.88  | 6.16  | 6 | 25.14   | 11.84   | 9  | 28.33  | 47.85  | 10 | 39.38  | 60.60  |
| Cr                            | 8 | 2.95   | 2.37   | 14 | 7.15   | 6.34   | 7 | 13.52   | 16.48   | 5 | 6.57   | 2.23  | 6 | 10.08   | 3.42    | 9  | 9.05   | 2.58   | 10 | 11.27  | 6.29   |
| Fe                            | 8 | 231.46 | 273.26 | 14 | 143.55 | 79.64  | 7 | 356.48  | 452.90  | 5 | 67.11  | 23.60 | 6 | 2131.08 | 3695.47 | 9  | 142.40 | 161.25 | 10 | 203.06 | 177.10 |
| Cu                            | 8 | 2.78   | 2.49   | 14 | 5.20   | 8.92   | 7 | 1.53    | 1.56    | 5 | 1.64   | 0.42  | 6 | 2.02    | 0.86    | 9  | 2.00   | 1.10   | 10 | 2.00   | 1.08   |
| Zn                            | 8 | 5.72   | 4.78   | 14 | 8.84   | 17.37  | 7 | 3.95    | 3.91    | 5 | 1.90   | 0.37  | 6 | 3.34    | 2.35    | 9  | 2.66   | 1.85   | 10 | 8.32   | 19.65  |
| Cd                            | 8 | 0.03   | 0.03   | 13 | 0.005  | 0.003  | 6 | 0.01    | 0.005   | 5 | 0.004  | 0.002 | 6 | 0.004   | 0.004   | 8  | 0.005  | 0.002  | 8  | 0.005  | 0.005  |
| Al                            | 8 | 290.24 | 360.99 | 14 | 214.31 | 385.26 | 7 | 2386.59 | 2989.09 | 5 | 23.67  | 27.12 | 5 | 3163.04 | 5436.37 | 9  | 60.24  | 95.34  | 10 | 152.55 | 294.87 |
| Pb                            | 8 | 0.28   | 0.18   | 14 | 0.46   | 0.67   | 6 | 0.29    | 0.26    | 3 | 0.17   | 0.16  | 6 | 0.40    | 0.55    | 9  | 0.13   | 0.10   | 8  | 0.15   | 0.19   |
| As                            | 8 | 17.75  | 15.76  | 14 | 2.94   | 1.79   | 7 | 8.67    | 7.57    | 5 | 1.35   | 0.30  | 6 | 0.81    | 0.84    | 9  | 0.96   | 0.75   | 10 | 1.05   | 1.27   |
| Sb                            | 8 | 0.19   | 0.19   | 14 | 0.03   | 0.01   | 7 | 0.16    | 0.35    | 5 | 0.03   | 0.004 | 6 | 0.04    | 0.02    | 9  | 0.07   | 0.04   | 10 | 0.03   | 0.02   |
| Mn                            | 8 | 7.02   | 17.44  | 14 | 24.18  | 84.43  | 7 | 43.15   | 99.77   | 5 | 0.84   | 0.77  | 6 | 6.20    | 9.76    | 9  | 4.78   | 6.65   | 10 | 2.44   | 5.31   |
| Co                            | 8 | 0.10   | 0.15   | 14 | 0.06   | 0.04   | 7 | 0.13    | 0.16    | 5 | 0.03   | 0.01  | 6 | 0.23    | 0.28    | 9  | 0.07   | 0.06   | 10 | 0.06   | 0.02   |
| Ni                            | 8 | 2.22   | 2.82   | 14 | 1.05   | 0.50   | 7 | 0.95    | 0.64    | 5 | 0.69   | 0.15  | 6 | 1.13    | 0.70    | 9  | 0.83   | 0.39   | 10 | 1.26   | 0.51   |
| Se                            | 8 | 0.17   | 0.14   | 14 | 0.22   | 0.22   | 5 | 0.15    | 0.07    | 5 | 0.17   | 0.03  | 4 | 0.26    | 0.09    | 9  | 0.52   | 0.62   | 7  | 0.32   | 0.14   |

**Table S6.** Factor loadings of the study parameters in dry season with PCA

| Parameter                     | Principal Component |         |          |          |         |         |         |        |
|-------------------------------|---------------------|---------|----------|----------|---------|---------|---------|--------|
|                               | 1                   | 2       | 3        | 4        | 5       | 6       | 7       | 8      |
| pH                            | -0.186              | -0.028  | 0.059    | 0.103    | 0.063   | -0.904* | 0.076   | -0.094 |
| EC                            | 0.929*              | 0.027   | -0.132   | 0.166    | 0.134   | 0.067   | 0.121   | -0.000 |
| Temperature                   | 0.200               | -0.077  | -0.019   | 0.837*   | -0.047  | -0.166  | 0.177   | -0.148 |
| TDS                           | 0.948*              | 0.050   | -0.089   | 0.174    | 0.129   | 0.073   | 0.110   | 0.017  |
| Turbidity                     | -0.038              | 0.188   | 0.177    | -0.308   | -0.088  | 0.022   | 0.098   | 0.788* |
| Color                         | -0.158              | 0.328   | 0.102    | -0.011   | 0.049   | 0.074   | -0.051  | 0.724* |
| Acidity                       | 0.203               | 0.227   | -0.658** | 0.061    | 0.060   | 0.428   | 0.093   | -0.212 |
| Alkalinity                    | 0.792*              | -0.011  | -0.008   | 0.291    | -0.139  | 0.173   | 0.031   | -0.310 |
| Hardness                      | 0.964*              | 0.038   | 0.101    | -0.077   | -0.079  | 0.022   | -0.012  | -0.087 |
| COD                           | -0.049              | 0.656** | 0.123    | 0.196    | 0.217   | 0.332   | 0.149   | 0.353  |
| Na <sup>+</sup>               | 0.697**             | -0.032  | -0.350   | 0.387    | 0.215   | 0.051   | 0.203   | -0.096 |
| K <sup>+</sup>                | 0.628**             | 0.032   | -0.493   | 0.028    | 0.424   | 0.219   | 0.086   | -0.015 |
| Ca <sup>2+</sup>              | 0.903*              | 0.192   | 0.189    | -0.141   | 0.011   | 0.035   | 0.047   | 0.028  |
| Mg <sup>2+</sup>              | 0.907*              | -0.107  | -0.001   | -0.008   | -0.147  | 0.009   | -0.082  | -0.199 |
| Cl <sup>-</sup>               | 0.537**             | 0.203   | -0.018   | -0.067   | 0.622** | -0.275  | 0.131   | 0.202  |
| SO <sub>4</sub> <sup>2-</sup> | 0.631**             | -0.124  | -0.191   | -0.306   | 0.291   | 0.040   | 0.186   | 0.262  |
| Ba                            | 0.542**             | 0.239   | -0.012   | 0.022    | 0.255   | -0.078  | -0.151  | 0.456  |
| Cr                            | 0.113               | 0.015   | 0.852*   | 0.101    | -0.142  | -0.034  | 0.056   | 0.169  |
| Fe                            | 0.087               | 0.432   | 0.801*   | -0.159   | -0.061  | 0.034   | 0.145   | 0.164  |
| Cu                            | 0.201               | 0.727** | 0.012    | -0.342   | 0.090   | -0.018  | 0.175   | 0.054  |
| Zn                            | -0.045              | 0.793*  | 0.112    | 0.011    | 0.005   | -0.030  | -0.020  | 0.186  |
| Cd                            | 0.361               | 0.422   | -0.231   | 0.113    | -0.382  | 0.147   | 0.378   | 0.316  |
| Al                            | -0.049              | 0.452   | 0.514**  | -0.213   | -0.212  | 0.136   | 0.295   | 0.326  |
| Pb                            | 0.065               | -0.180  | -0.789*  | 0.023    | -0.346  | -0.051  | 0.050   | 0.219  |
| As                            | 0.296               | 0.015   | -0.217   | 0.168    | -0.135  | 0.079   | 0.681** | -0.414 |
| Sb                            | 0.001               | 0.124   | 0.251    | 0.132    | 0.204   | -0.154  | 0.777*  | 0.153  |
| Mn                            | 0.277               | 0.596** | 0.188    | -0.002   | -0.477  | -0.154  | -0.169  | 0.108  |
| Co                            | 0.543**             | 0.1827  | 0.143    | -0.543** | -0.039  | -0.356  | -0.103  | 0.233  |
| Ni                            | 0.766*              | 0.275   | 0.186    | -0.157   | -0.171  | 0.052   | 0.166   | 0.079  |
| Se                            | 0.307               | 0.431   | 0.389    | -0.138   | 0.000   | 0.321   | 0.393   | 0.118  |
| Eigenvalues <sup>a</sup>      | 8.889               | 5.772   | 2.574    | 2.226    | 1.689   | 1.289   | 1.091   | 1.024  |
| Total variance (%)            | 29.630              | 19.240  | 8.582    | 7.420    | 5.632   | 4.297   | 3.638   | 3.416  |
| Accumulated variance (%)      | 29.630              | 48.871  | 57.452   | 64.872   | 70.504  | 74.800  | 78.439  | 81.855 |

\* Loadings with p<0.05, \*\*No significant but moderate loadings. <sup>a</sup>>1

**Table S7.** Factor loadings of the study parameters in rainy season with PCA

| Parameter                     | Principal Component |         |          |          |         |        |         |         |
|-------------------------------|---------------------|---------|----------|----------|---------|--------|---------|---------|
|                               | 1                   | 2       | 3        | 4        | 5       | 6      | 7       | 8       |
| pH                            | -0.109              | -0.055  | -0.633** | -0.155   | -0.208  | 0.106  | -0.008  | 0.366   |
| EC                            | 0.292               | 0.142   | 0.340    | -0.037   | 0.803*  | 0.134  | 0.062   | 0.134   |
| Temperature                   | 0.002               | -0.136  | 0.840*   | -0.120   | 0.042   | 0.175  | 0.165   | 0.041   |
| TDS                           | 0.228               | 0.042   | 0.246    | 0.002    | 0.753*  | 0.162  | 0.027   | -0.074  |
| DO                            | -0.173              | -0.009  | -0.734** | 0.156    | -0.207  | 0.028  | 0.053   | -0.014  |
| Turbidity                     | -0.160              | 0.671** | 0.004    | 0.467    | -0.362  | -0.069 | -0.001  | 0.031   |
| Color                         | -0.176              | 0.554** | -0.318   | 0.106    | -0.159  | 0.161  | -0.019  | -0.191  |
| Acidity                       | 0.303               | -0.275  | 0.269    | -0.331   | 0.441   | 0.097  | -0.073  | -0.442  |
| Alkalinity                    | 0.337               | -0.077  | 0.052    | -0.065   | 0.643** | -0.297 | 0.147   | -0.017  |
| Hardness                      | 0.937*              | -0.075  | 0.090    | -0.056   | 0.259   | -0.017 | -0.005  | 0.085   |
| COD                           | 0.096               | 0.238   | -0.031   | 0.703**  | 0.013   | 0.199  | 0.025   | 0.265   |
| Na <sup>+</sup>               | 0.823*              | -0.064  | 0.294    | -0.145   | -0.023  | 0.247  | 0.098   | -0.178  |
| K <sup>+</sup>                | 0.456               | 0.245   | -0.073   | 0.549**  | 0.241   | 0.066  | -0.057  | 0.038   |
| Ca <sup>2+</sup>              | 0.934*              | -0.059  | 0.004    | -0.023   | 0.249   | 0.059  | -0.045  | 0.057   |
| Mg <sup>2+</sup>              | 0.919*              | -0.113  | 0.154    | -0.056   | 0.210   | -0.088 | 0.035   | 0.074   |
| Cl <sup>-</sup>               | 0.312               | -0.296  | -0.079   | 0.170    | 0.528** | 0.504  | -0.113  | -0.261  |
| NO <sub>3</sub> <sup>-</sup>  | 0.298               | 0.029   | -0.164   | -0.612** | 0.270   | 0.295  | -0.090  | 0.016   |
| SO <sub>4</sub> <sup>2-</sup> | 0.447               | 0.445   | 0.079    | 0.034    | 0.188   | 0.370  | -0.222  | -0.009  |
| Ba                            | 0.170               | 0.431   | -0.333   | -0.055   | 0.619** | 0.093  | 0.250   | 0.080   |
| Cr                            | 0.164               | 0.029   | -0.108   | 0.071    | 0.102   | -0.096 | -0.240  | 0.667** |
| Fe                            | -0.147              | 0.857*  | 0.118    | 0.136    | -0.138  | 0.010  | 0.190   | 0.204   |
| Cu                            | 0.090               | -0.069  | 0.101    | -0.146   | 0.280   | -0.005 | 0.700** | 0.160   |
| Zn                            | 0.044               | 0.118   | 0.121    | 0.004    | 0.154   | -0.108 | 0.799*  | -0.269  |
| Cd                            | 0.066               | 0.359   | 0.410    | 0.013    | 0.318   | 0.468  | 0.221   | -0.191  |
| Al                            | -0.420              | 0.070   | -0.029   | 0.654**  | -0.075  | 0.087  | -0.090  | -0.158  |
| Pb                            | -0.133              | 0.196   | 0.035    | 0.080    | -0.282  | 0.148  | 0.651** | -0.119  |
| As                            | 0.180               | -0.061  | 0.784*   | 0.359    | -0.035  | 0.312  | 0.135   | -0.115  |
| Sb                            | 0.046               | 0.205   | 0.143    | 0.077    | 0.015   | 0.850* | 0.036   | -0.052  |
| Mn                            | 0.024               | 0.549** | -0.129   | 0.248    | 0.073   | 0.016  | 0.498   | -0.140  |
| Co                            | -0.055              | 0.877*  | -0.098   | 0.058    | 0.240   | 0.146  | 0.066   | 0.102   |
| Ni                            | 0.172               | 0.547** | 0.182    | -0.160   | 0.441   | -0.130 | 0.019   | -0.320  |
| Se                            | -0.048              | -0.235  | 0.183    | -0.111   | 0.581** | 0.495  | -0.022  | 0.232   |
| Eigenvalues <sup>a</sup>      | 7.623               | 4.786   | 3.091    | 2.347    | 2.056   | 1.482  | 1.421   | 1.192   |
| Total variance (%)            | 23.82               | 14.955  | 9.660    | 7.333    | 6.425   | 4.630  | 4.440   | 3.726   |
| Accumulated variance (%)      | 23.82               | 38.778  | 48.437   | 55.771   | 62.196  | 66.826 | 71.265  | 74.991  |

\* Loadings with p<0.05, \*\*No significant but moderate loadings. <sup>a</sup>>1

**Table S8.** Correlation matrix (rs) between the physicochemical characterization variables of drinking water supply in the dry season considering total sampling sites

|                               | pH    | Cond  | Temp  | TDS   | DO    | Turb  | Color | Acid  | Alkal | Hardness | C.O.D. | Na <sup>+</sup> | K <sup>+</sup> | Ca <sup>2+</sup> | Mg <sup>2+</sup> | Cl <sup>-</sup> | NO <sub>3</sub> <sup>-</sup> | SO <sub>4</sub> <sup>2-</sup> | Ba    | Cr    | Fe    | Cu   | Zn    | Cd   | Al    | Pb    | As    | Sb    | Mn    | Co   | Ni   | Se |
|-------------------------------|-------|-------|-------|-------|-------|-------|-------|-------|-------|----------|--------|-----------------|----------------|------------------|------------------|-----------------|------------------------------|-------------------------------|-------|-------|-------|------|-------|------|-------|-------|-------|-------|-------|------|------|----|
| pH                            |       |       |       |       |       |       |       |       |       |          |        |                 |                |                  |                  |                 |                              |                               |       |       |       |      |       |      |       |       |       |       |       |      |      |    |
| Cond                          | -0.08 |       |       |       |       |       |       |       |       |          |        |                 |                |                  |                  |                 |                              |                               |       |       |       |      |       |      |       |       |       |       |       |      |      |    |
| Temp                          | -0.16 | 0.60  |       |       |       |       |       |       |       |          |        |                 |                |                  |                  |                 |                              |                               |       |       |       |      |       |      |       |       |       |       |       |      |      |    |
| TDS                           | -0.08 | 1.00  | 0.61  |       |       |       |       |       |       |          |        |                 |                |                  |                  |                 |                              |                               |       |       |       |      |       |      |       |       |       |       |       |      |      |    |
| DO                            | 0.24  | -0.42 | -0.53 | -0.41 |       |       |       |       |       |          |        |                 |                |                  |                  |                 |                              |                               |       |       |       |      |       |      |       |       |       |       |       |      |      |    |
| Turb                          | -0.10 | -0.17 | -0.37 | -0.19 | -0.04 |       |       |       |       |          |        |                 |                |                  |                  |                 |                              |                               |       |       |       |      |       |      |       |       |       |       |       |      |      |    |
| Color                         | -0.08 | -0.24 | -0.28 | -0.24 | -0.04 | 0.51  |       |       |       |          |        |                 |                |                  |                  |                 |                              |                               |       |       |       |      |       |      |       |       |       |       |       |      |      |    |
| Acid                          | 0.28  | 0.44  | 0.25  | 0.43  | -0.11 | -0.20 | -0.05 |       |       |          |        |                 |                |                  |                  |                 |                              |                               |       |       |       |      |       |      |       |       |       |       |       |      |      |    |
| Alkal                         | 0.01  | 0.79  | 0.62  | 0.78  | -0.31 | -0.45 | -0.52 | 0.36  |       |          |        |                 |                |                  |                  |                 |                              |                               |       |       |       |      |       |      |       |       |       |       |       |      |      |    |
| Hardness                      | -0.12 | 0.74  | 0.26  | 0.74  | -0.21 | -0.18 | -0.48 | 0.28  | 0.79  |          |        |                 |                |                  |                  |                 |                              |                               |       |       |       |      |       |      |       |       |       |       |       |      |      |    |
| COD                           | 0.01  | 0.29  | 0.34  | 0.31  | -0.42 | 0.05  | 0.38  | 0.26  | -0.02 | -0.18    |        |                 |                |                  |                  |                 |                              |                               |       |       |       |      |       |      |       |       |       |       |       |      |      |    |
| Na <sup>+</sup>               | 0.15  | 0.87  | 0.70  | 0.86  | -0.42 | -0.23 | -0.21 | 0.53  | 0.70  | 0.47     | 0.41   |                 |                |                  |                  |                 |                              |                               |       |       |       |      |       |      |       |       |       |       |       |      |      |    |
| K <sup>+</sup>                | -0.09 | 0.83  | 0.37  | 0.84  | -0.28 | -0.04 | -0.06 | 0.42  | 0.61  | 0.58     | 0.29   | 0.70            |                |                  |                  |                 |                              |                               |       |       |       |      |       |      |       |       |       |       |       |      |      |    |
| Ca <sup>2+</sup>              | -0.11 | 0.72  | 0.24  | 0.73  | -0.31 | -0.10 | -0.28 | 0.29  | 0.68  | 0.87     | 0.02   | 0.47            | 0.64           |                  |                  |                 |                              |                               |       |       |       |      |       |      |       |       |       |       |       |      |      |    |
| Mg <sup>2+</sup>              | -0.09 | 0.70  | 0.26  | 0.70  | -0.11 | -0.21 | -0.53 | 0.24  | 0.79  | 0.97     | -0.24  | 0.45            | 0.52           | 0.78             |                  |                 |                              |                               |       |       |       |      |       |      |       |       |       |       |       |      |      |    |
| Cl <sup>-</sup>               | 0.08  | 0.60  | 0.19  | 0.61  | -0.11 | 0.10  | -0.04 | 0.25  | 0.28  | 0.43     | 0.21   | 0.54            | 0.60           | 0.35             | 0.41             |                 |                              |                               |       |       |       |      |       |      |       |       |       |       |       |      |      |    |
| NO <sub>3</sub> <sup>-</sup>  | -0.21 | 0.24  | -0.21 | 0.24  | 0.07  | 0.20  | 0.09  | 0.03  | -0.02 | 0.29     | -0.03  | 0.08            | 0.39           | 0.27             | 0.25             | 0.59            |                              |                               |       |       |       |      |       |      |       |       |       |       |       |      |      |    |
| SO <sub>4</sub> <sup>2-</sup> | -0.02 | 0.45  | -0.04 | 0.46  | -0.15 | 0.38  | 0.32  | 0.23  | 0.01  | 0.22     | 0.31   | 0.40            | 0.63           | 0.32             | 0.19             | 0.65            | 0.48                         |                               |       |       |       |      |       |      |       |       |       |       |       |      |      |    |
| Ba                            | -0.27 | 0.58  | 0.09  | 0.57  | -0.33 | 0.23  | 0.09  | 0.00  | 0.26  | 0.49     | -0.04  | 0.32            | 0.55           | 0.45             | 0.43             | 0.62            | 0.61                         | 0.42                          |       |       |       |      |       |      |       |       |       |       |       |      |      |    |
| Cr                            | -0.39 | -0.10 | 0.25  | -0.10 | -0.19 | -0.23 | -0.29 | -0.35 | 0.11  | -0.01    | -0.41  | -0.08           | -0.09          | -0.12            | 0.00             | -0.10           | 0.08                         | -0.27                         | 0.13  |       |       |      |       |      |       |       |       |       |       |      |      |    |
| Fe                            | 0.17  | -0.12 | 0.01  | -0.12 | 0.11  | -0.37 | -0.25 | 0.30  | -0.05 | 0.01     | -0.10  | 0.01            | -0.24          | 0.02             | -0.01            | -0.12           | -0.22                        | -0.14                         | -0.25 | -0.13 |       |      |       |      |       |       |       |       |       |      |      |    |
| Cu                            | 0.17  | 0.39  | -0.01 | 0.38  | -0.27 | 0.09  | 0.02  | 0.27  | 0.13  | 0.26     | 0.39   | 0.38            | 0.23           | 0.37             | 0.20             | 0.42            | 0.29                         | 0.27                          | 0.28  | -0.43 | 0.03  |      |       |      |       |       |       |       |       |      |      |    |
| Zn                            | 0.15  | -0.12 | -0.10 | -0.12 | -0.01 | 0.10  | 0.26  | -0.01 | -0.19 | -0.29    | 0.35   | -0.05           | -0.16          | -0.26            | -0.26            | -0.03           | -0.13                        | -0.14                         | -0.04 | -0.37 | -0.10 | 0.35 |       |      |       |       |       |       |       |      |      |    |
| Cd                            | -0.16 | 0.40  | 0.33  | 0.39  | -0.31 | 0.13  | -0.04 | 0.13  | 0.23  | 0.23     | 0.29   | 0.33            | 0.17           | 0.16             | 0.21             | 0.10            | 0.04                         | -0.05                         | 0.23  | -0.25 | -0.32 | 0.37 | 0.23  |      |       |       |       |       |       |      |      |    |
| Al                            | 0.24  | -0.22 | -0.27 | -0.24 | 0.12  | 0.19  | 0.04  | -0.09 | -0.19 | -0.19    | -0.12  | -0.19           | -0.25          | -0.22            | -0.15            | -0.20           | -0.09                        | -0.14                         | -0.09 | -0.02 | -0.06 | 0.09 | 0.30  | 0.18 |       |       |       |       |       |      |      |    |
| Pb                            | 0.01  | 0.17  | 0.00  | 0.14  | -0.10 | 0.16  | -0.05 | -0.13 | 0.01  | 0.17     | -0.07  | 0.05            | -0.01          | 0.13             | 0.20             | 0.01            | 0.14                         | 0.02                          | 0.24  | 0.01  | -0.29 | 0.43 | 0.12  | 0.37 | 0.29  |       |       |       |       |      |      |    |
| As                            | 0.43  | 0.17  | 0.37  | 0.15  | -0.11 | -0.29 | -0.27 | 0.51  | 0.32  | 0.02     | 0.22   | 0.50            | -0.02          | 0.05             | 0.03             | -0.14           | -0.47                        | -0.19                         | -0.48 | -0.21 | 0.36  | 0.24 | 0.10  | 0.20 | 0.09  | -0.11 |       |       |       |      |      |    |
| Sb                            | 0.38  | 0.11  | 0.19  | 0.09  | -0.30 | 0.04  | 0.01  | 0.11  | 0.06  | -0.26    | 0.32   | 0.41            | 0.17           | -0.13            | -0.31            | 0.11            | -0.04                        | 0.07                          | -0.02 | 0.01  | -0.07 | 0.19 | 0.11  | 0.13 | 0.10  | -0.13 | 0.50  |       |       |      |      |    |
| Mn                            | -0.05 | 0.07  | -0.06 | 0.06  | -0.25 | -0.09 | -0.03 | 0.14  | 0.14  | 0.21     | 0.01   | -0.11           | -0.10          | 0.20             | 0.15             | -0.17           | -0.06                        | -0.22                         | 0.18  | -0.25 | 0.13  | 0.20 | 0.26  | 0.41 | 0.16  | 0.11  | 0.00  | -0.11 |       |      |      |    |
| Co                            | 0.06  | 0.24  | -0.41 | 0.22  | 0.10  | 0.28  | 0.08  | 0.30  | -0.01 | 0.40     | -0.02  | 0.01            | 0.25           | 0.49             | 0.33             | 0.27            | 0.48                         | 0.38                          | 0.36  | -0.50 | 0.03  | 0.53 | 0.09  | 0.13 | 0.09  | 0.30  | -0.15 | -0.20 | 0.32  |      |      |    |
| Ni                            | 0.01  | 0.59  | 0.27  | 0.58  | -0.29 | -0.03 | -0.28 | 0.16  | 0.45  | 0.64     | -0.02  | 0.45            | 0.43           | 0.60             | 0.60             | 0.35            | 0.38                         | 0.14                          | 0.56  | -0.02 | -0.13 | 0.46 | -0.14 | 0.49 | 0.02  | 0.52  | 0.03  | -0.07 | 0.22  | 0.42 |      |    |
| Se                            | 0.17  | 0.00  | 0.07  | 0.00  | 0.13  | -0.03 | 0.06  | -0.02 | -0.22 | -0.30    | 0.23   | 0.19            | -0.10          | -0.21            | -0.30            | 0.06            | -0.07                        | -0.07                         | -0.09 | -0.15 | -0.11 | 0.24 | 0.11  | 0.30 | -0.05 | 0.11  | 0.24  | 0.26  | -0.14 | 0.04 | 0.20 |    |



**Table S9.** Correlation matrix (rs) between the physicochemical characterization variables of drinking water supply in the rainy season considering total sampling sites

|                               | pH    | Cond  | Temp  | TDS   | DO    | Turb  | Color | Acid  | Alkal | Hardness | COD   | Na <sup>+</sup> | K <sup>+</sup> | Ca <sup>2+</sup> | Mg <sup>2+</sup> | Cl <sup>-</sup> | NO <sub>3</sub> <sup>-</sup> | SO <sub>4</sub> <sup>2-</sup> | Ba    | Cr    | Fe   | Cu    | Zn    | Cd   | Al   | Pb   | As   | Sb   | Mn   | Co   | Ni   | Se |
|-------------------------------|-------|-------|-------|-------|-------|-------|-------|-------|-------|----------|-------|-----------------|----------------|------------------|------------------|-----------------|------------------------------|-------------------------------|-------|-------|------|-------|-------|------|------|------|------|------|------|------|------|----|
| pH                            |       |       |       |       |       |       |       |       |       |          |       |                 |                |                  |                  |                 |                              |                               |       |       |      |       |       |      |      |      |      |      |      |      |      |    |
| Cond                          | -0.16 |       |       |       |       |       |       |       |       |          |       |                 |                |                  |                  |                 |                              |                               |       |       |      |       |       |      |      |      |      |      |      |      |      |    |
| Temp                          | -0.35 | 0.46  |       |       |       |       |       |       |       |          |       |                 |                |                  |                  |                 |                              |                               |       |       |      |       |       |      |      |      |      |      |      |      |      |    |
| TDS                           | -0.14 | 0.97  |       |       |       |       |       |       |       |          |       |                 |                |                  |                  |                 |                              |                               |       |       |      |       |       |      |      |      |      |      |      |      |      |    |
| DO                            | 0.38  | -0.46 | -0.49 | -0.47 |       |       |       |       |       |          |       |                 |                |                  |                  |                 |                              |                               |       |       |      |       |       |      |      |      |      |      |      |      |      |    |
| Turb                          | 0.01  | -0.09 | -0.07 | -0.13 | 0.15  |       |       |       |       |          |       |                 |                |                  |                  |                 |                              |                               |       |       |      |       |       |      |      |      |      |      |      |      |      |    |
| Color                         | 0.07  | -0.08 | -0.27 | -0.04 | 0.14  | 0.43  |       |       |       |          |       |                 |                |                  |                  |                 |                              |                               |       |       |      |       |       |      |      |      |      |      |      |      |      |    |
| Acid                          | -0.34 | 0.46  | 0.30  | 0.49  | -0.51 | -0.27 | -0.09 |       |       |          |       |                 |                |                  |                  |                 |                              |                               |       |       |      |       |       |      |      |      |      |      |      |      |      |    |
| Alkal                         | -0.18 | 0.81  | 0.41  | 0.80  | -0.45 | -0.25 | -0.14 | 0.50  |       |          |       |                 |                |                  |                  |                 |                              |                               |       |       |      |       |       |      |      |      |      |      |      |      |      |    |
| Hardness                      | -0.03 | 0.67  | 0.24  | 0.66  | -0.29 | -0.19 | -0.14 | 0.28  | 0.72  |          |       |                 |                |                  |                  |                 |                              |                               |       |       |      |       |       |      |      |      |      |      |      |      |      |    |
| COD                           | -0.01 | 0.17  | -0.07 | 0.16  | 0.15  | 0.47  | 0.39  | -0.21 | 0.01  | 0.05     |       |                 |                |                  |                  |                 |                              |                               |       |       |      |       |       |      |      |      |      |      |      |      |      |    |
| Na <sup>+</sup>               | -0.29 | 0.63  | 0.61  | 0.63  | -0.49 | -0.05 | -0.06 | 0.41  | 0.48  | 0.58     | 0.18  |                 |                |                  |                  |                 |                              |                               |       |       |      |       |       |      |      |      |      |      |      |      |      |    |
| K <sup>+</sup>                | -0.11 | 0.35  | 0.24  | 0.33  | 0.03  | 0.36  | -0.07 | -0.05 | 0.13  | 0.27     | 0.44  | 0.47            |                |                  |                  |                 |                              |                               |       |       |      |       |       |      |      |      |      |      |      |      |      |    |
| Ca <sup>2+</sup>              | -0.02 | 0.64  | 0.11  | 0.65  | -0.19 | -0.16 | -0.05 | 0.22  | 0.70  | 0.94     | 0.13  | 0.53            | 0.28           |                  |                  |                 |                              |                               |       |       |      |       |       |      |      |      |      |      |      |      |      |    |
| Mg <sup>2+</sup>              | -0.01 | 0.62  | 0.35  | 0.59  | -0.33 | -0.18 | -0.21 | 0.28  | 0.66  | 0.93     | -0.02 | 0.57            | 0.28           | 0.79             |                  |                 |                              |                               |       |       |      |       |       |      |      |      |      |      |      |      |      |    |
| Cl <sup>-</sup>               | -0.14 | 0.60  | 0.11  | 0.63  | -0.15 | -0.12 | 0.02  | 0.37  | 0.43  | 0.28     | 0.20  | 0.42            | 0.33           | 0.33             | 0.17             |                 |                              |                               |       |       |      |       |       |      |      |      |      |      |      |      |      |    |
| NO <sub>3</sub> <sup>-</sup>  | 0.11  | 0.31  | -0.17 | 0.27  | -0.10 | -0.25 | 0.01  | 0.27  | 0.17  | 0.40     | -0.17 | 0.17            | 0.04           | 0.35             | 0.36             | 0.33            |                              |                               |       |       |      |       |       |      |      |      |      |      |      |      |      |    |
| SO <sub>4</sub> <sup>2-</sup> | -0.07 | 0.40  | 0.10  | 0.34  | -0.10 | 0.26  | -0.03 | 0.19  | 0.13  | 0.39     | 0.32  | 0.48            | 0.60           | 0.39             | 0.35             | 0.44            | 0.42                         |                               |       |       |      |       |       |      |      |      |      |      |      |      |      |    |
| Ba                            | 0.03  | 0.61  | -0.03 | 0.56  | -0.13 | 0.09  | 0.20  | 0.26  | 0.48  | 0.42     | 0.05  | 0.28            | 0.27           | 0.42             | 0.36             | 0.43            | 0.41                         | 0.40                          |       |       |      |       |       |      |      |      |      |      |      |      |      |    |
| Cr                            | 0.09  | 0.33  | -0.10 | 0.30  | -0.04 | 0.01  | 0.01  | -0.07 | 0.44  | 0.49     | 0.09  | 0.12            | 0.12           | 0.56             | 0.37             | 0.17            | 0.13                         | 0.18                          | 0.30  |       |      |       |       |      |      |      |      |      |      |      |      |    |
| Fe                            | -0.10 | 0.25  | 0.02  | 0.21  | -0.28 | 0.52  | 0.41  | 0.00  | 0.15  | 0.15     | 0.30  | 0.19            | 0.17           | 0.14             | 0.11             | -0.01           | -0.01                        | 0.24                          | 0.39  | 0.16  |      |       |       |      |      |      |      |      |      |      |      |    |
| Cu                            | -0.15 | 0.42  | 0.22  | 0.38  | -0.27 | -0.01 | 0.02  | 0.27  | 0.41  | 0.33     | 0.02  | 0.26            | 0.03           | 0.25             | 0.31             | 0.14            | 0.30                         | 0.08                          | 0.28  | 0.09  | 0.24 |       |       |      |      |      |      |      |      |      |      |    |
| Zn                            | -0.32 | 0.18  | 0.10  | 0.19  | -0.32 | 0.06  | 0.19  | 0.33  | 0.16  | 0.03     | -0.09 | 0.25            | 0.01           | 0.00             | 0.09             | -0.05           | 0.04                         | -0.09                         | 0.31  | -0.13 | 0.29 | 0.44  |       |      |      |      |      |      |      |      |      |    |
| Cd                            | -0.38 | 0.49  | 0.31  | 0.51  | -0.41 | 0.17  | 0.25  | 0.46  | 0.28  | 0.26     | 0.13  | 0.49            | 0.15           | 0.20             | 0.27             | 0.30            | 0.09                         | 0.31                          | 0.37  | -0.08 | 0.44 | 0.42  | 0.57  |      |      |      |      |      |      |      |      |    |
| Al                            | -0.09 | -0.03 | -0.22 | -0.07 | 0.02  | 0.64  | 0.43  | -0.08 | -0.18 | -0.24    | 0.40  | -0.12           | 0.11           | -0.17            | -0.28            | 0.02            | -0.07                        | 0.14                          | 0.11  | 0.06  | 0.54 | 0.03  | 0.18  | 0.18 |      |      |      |      |      |      |      |    |
| Pb                            | -0.15 | 0.16  | 0.07  | 0.15  | -0.30 | 0.16  | 0.20  | 0.18  | 0.08  | 0.02     | -0.07 | 0.21            | -0.04          | -0.01            | 0.05             | -0.05           | -0.01                        | 0.02                          | 0.22  | -0.10 | 0.54 | 0.40  | 0.62  | 0.60 | 0.28 |      |      |      |      |      |      |    |
| As                            | -0.43 | 0.40  | 0.54  | 0.42  | -0.53 | 0.10  | 0.02  | 0.36  | 0.36  | 0.20     | 0.28  | 0.58            | 0.28           | 0.18             | 0.23             | 0.20            | -0.28                        | 0.04                          | -0.09 | 0.07  | 0.23 | 0.25  | 0.30  | 0.52 | 0.17 | 0.35 |      |      |      |      |      |    |
| Sb                            | -0.01 | 0.20  | 0.07  | 0.21  | 0.03  | 0.08  | 0.28  | -0.01 | 0.04  | 0.02     | 0.34  | 0.28            | 0.20           | 0.13             | -0.13            | 0.47            | -0.03                        | 0.21                          | 0.07  | -0.01 | 0.16 | -0.06 | -0.08 | 0.29 | 0.08 | 0.11 | 0.35 |      |      |      |      |    |
| Mn                            | -0.10 | 0.12  | -0.05 | 0.11  | -0.08 | 0.37  | 0.38  | 0.05  | 0.15  | 0.10     | 0.20  | 0.17            | 0.21           | 0.12             | 0.07             | 0.08            | -0.09                        | 0.10                          | 0.46  | 0.08  | 0.64 | 0.12  | 0.51  | 0.40 | 0.49 | 0.48 | 0.24 | 0.13 |      |      |      |    |
| Co                            | -0.05 | 0.46  | -0.11 | 0.42  | -0.21 | 0.46  | 0.42  | 0.12  | 0.27  | 0.31     | 0.34  | 0.22            | 0.30           | 0.33             | 0.22             | 0.28            | 0.30                         | 0.47                          | 0.66  | 0.18  | 0.80 | 0.35  | 0.29  | 0.46 | 0.49 | 0.42 | 0.11 | 0.22 | 0.57 |      |      |    |
| Ni                            | -0.32 | 0.59  | 0.06  | 0.57  | -0.38 | 0.12  | 0.21  | 0.37  | 0.52  | 0.52     | 0.13  | 0.31            | 0.23           | 0.54             | 0.46             | 0.23            | 0.25                         | 0.39                          | 0.55  | 0.25  | 0.52 | 0.38  | 0.42  | 0.54 | 0.22 | 0.40 | 0.26 | 0.02 | 0.46 | 0.68 |      |    |
| Se                            | -0.09 | 0.55  | 0.13  | 0.51  | -0.24 | -0.19 | 0.03  | 0.24  | 0.49  | 0.37     | 0.28  | 0.22            | -0.02          | 0.36             | 0.26             | 0.53            | 0.30                         | 0.17                          | 0.34  | 0.38  | 0.14 | 0.31  | -0.02 | 0.24 | 0.03 | 0.00 | 0.26 | 0.31 | 0.08 | 0.27 | 0.28 |    |

Cond: Conductivity; Temp: Temperature; TDS: Total Dissolved Solids; DO: Dissolved Oxygen; Turb: Turbidity; Acid: Acidity; Alkal: Alkalinity; COD: Chemical Oxygen Demand. Bold values indicate p<0.05

**Figure S1.** Quality parameters of drinking water supply sources for humans in the regions of study and the permissible limits defined by WHO, NOM-040 and NOM-127. Green dots (•): rainy season, yellow dots (•): dry season. Vertical lines on the secondary x-axis represent the distribution of each municipality.

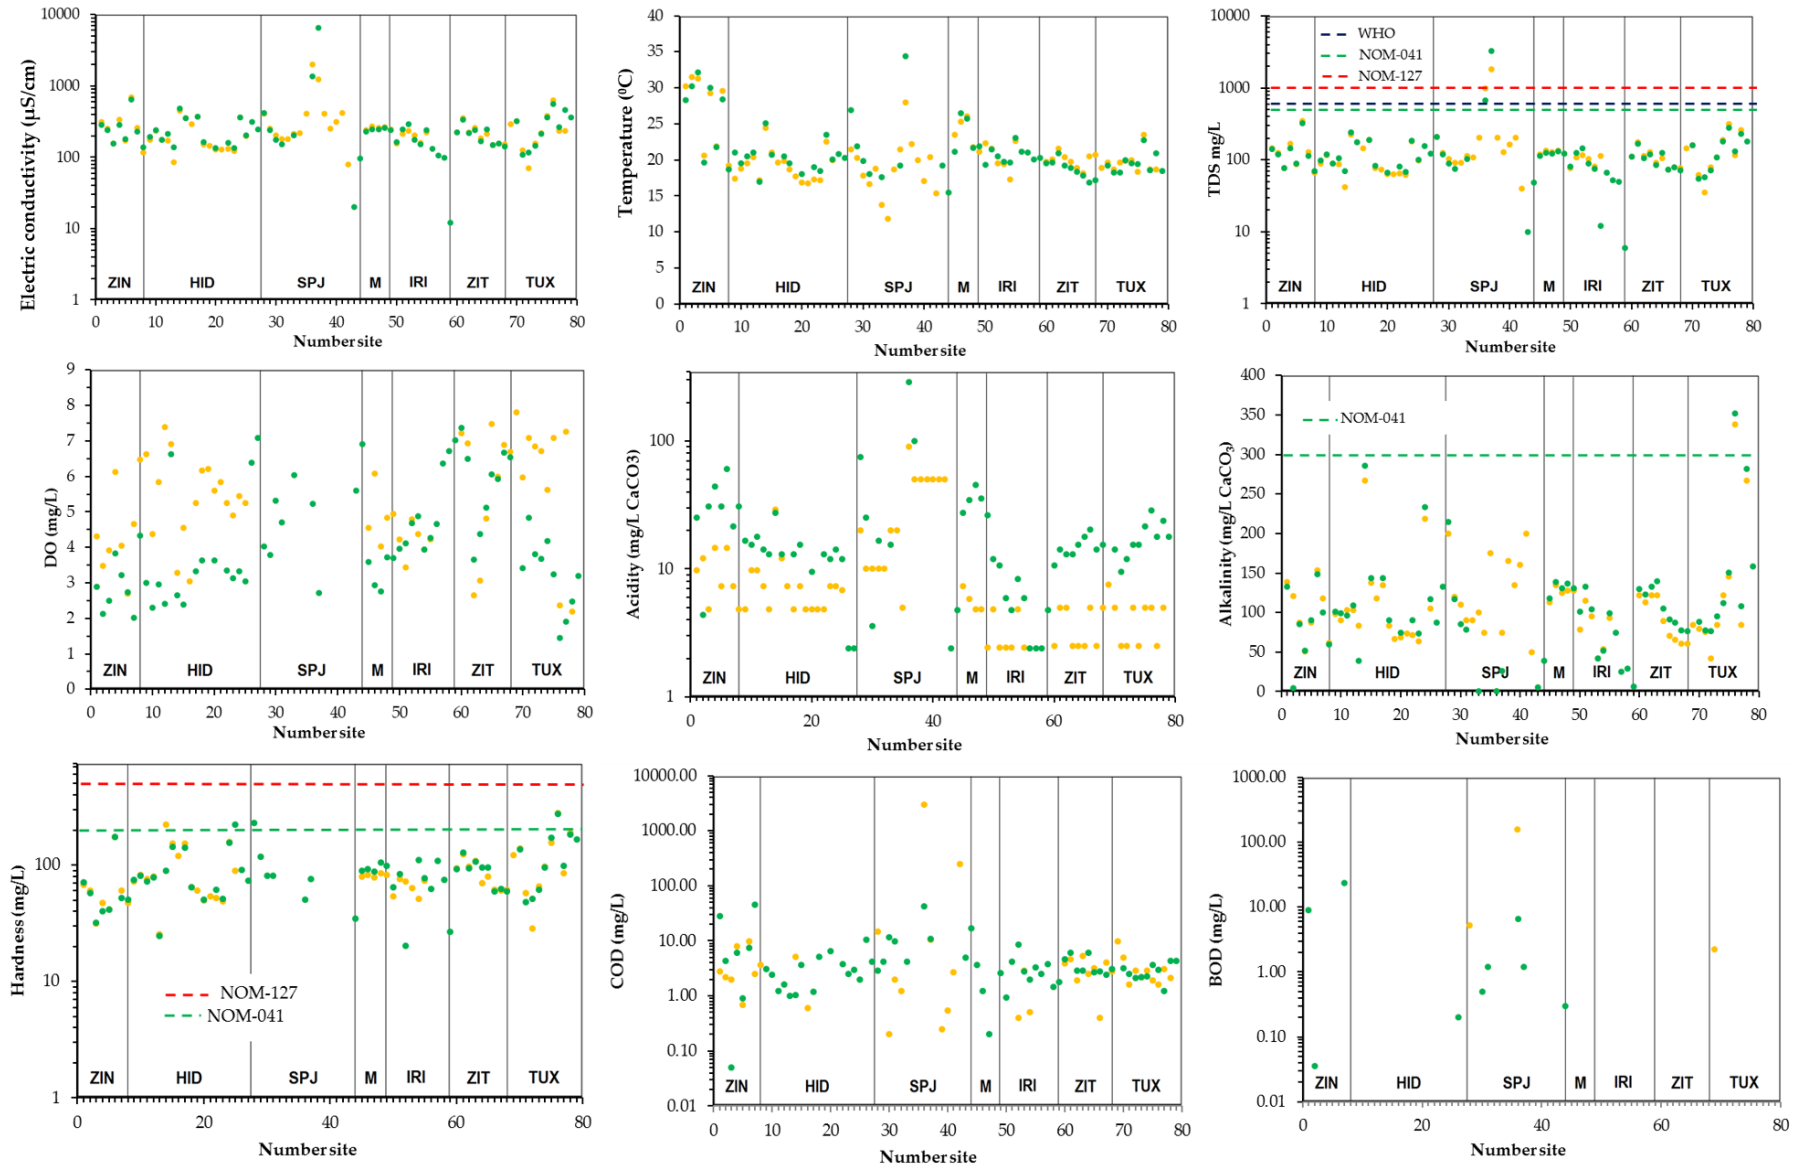

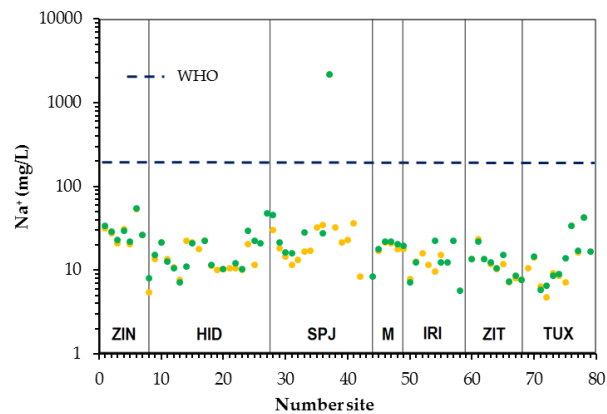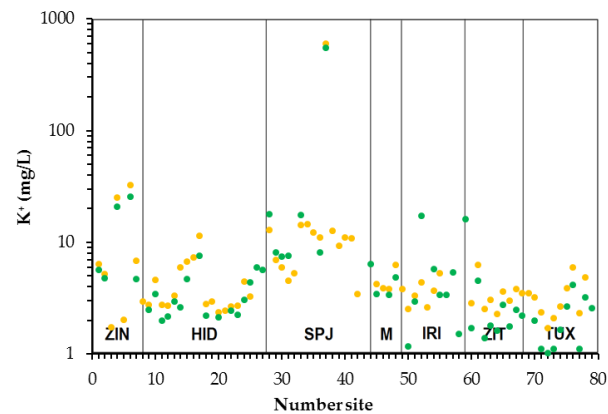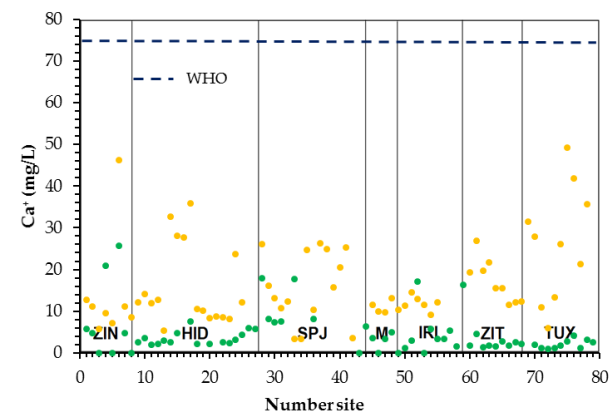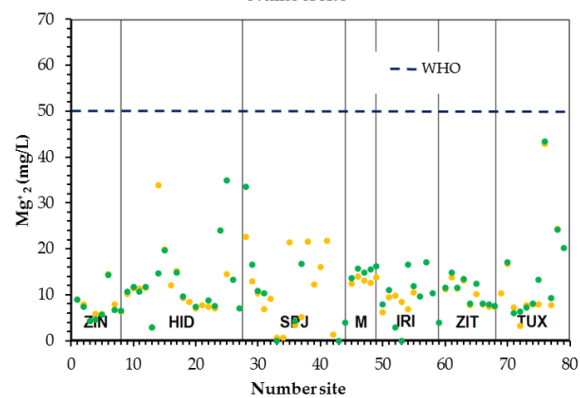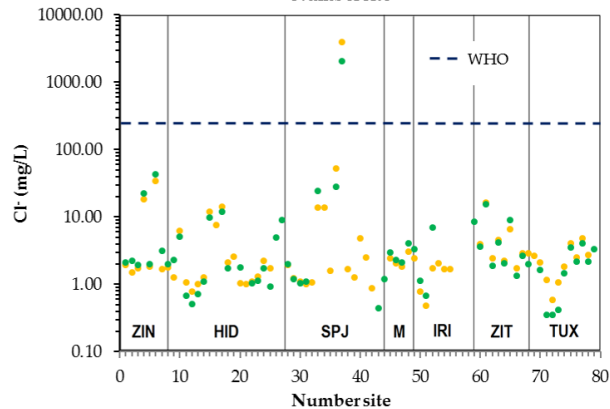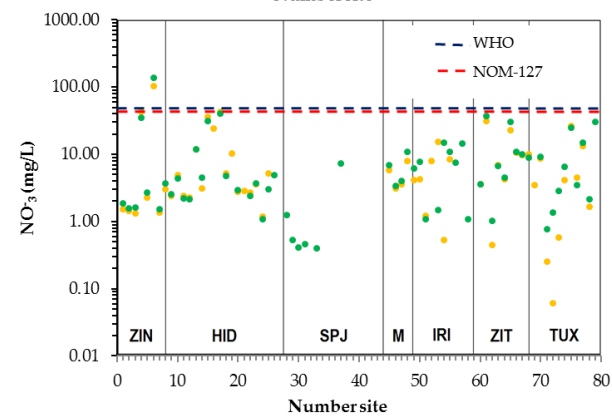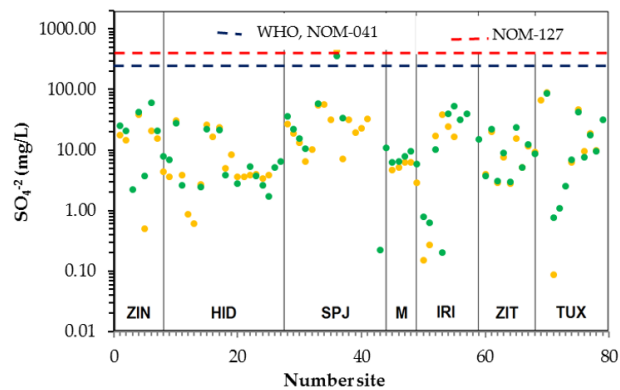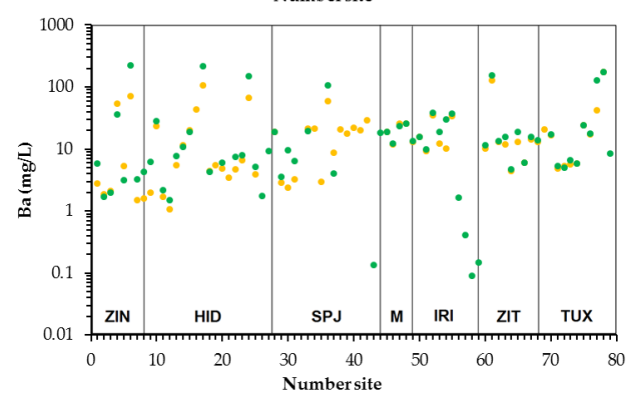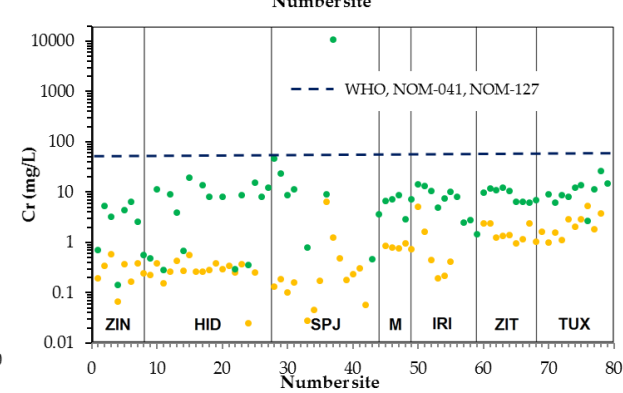

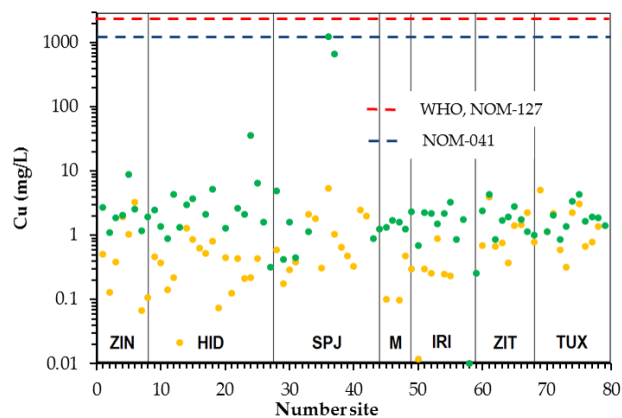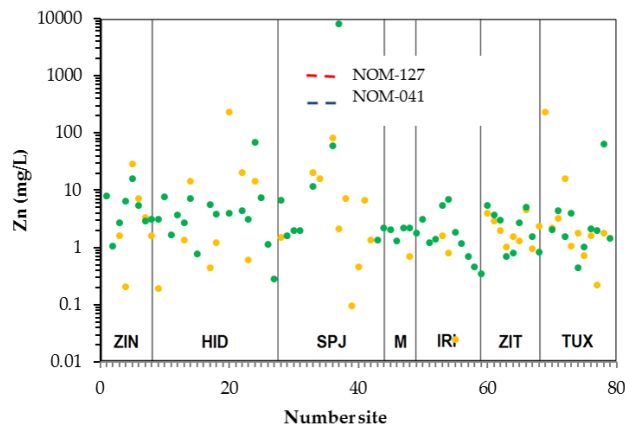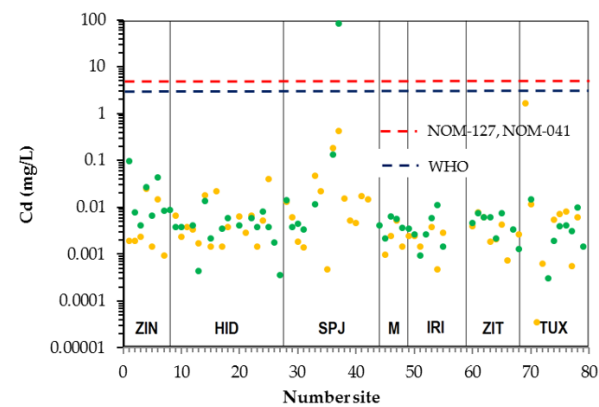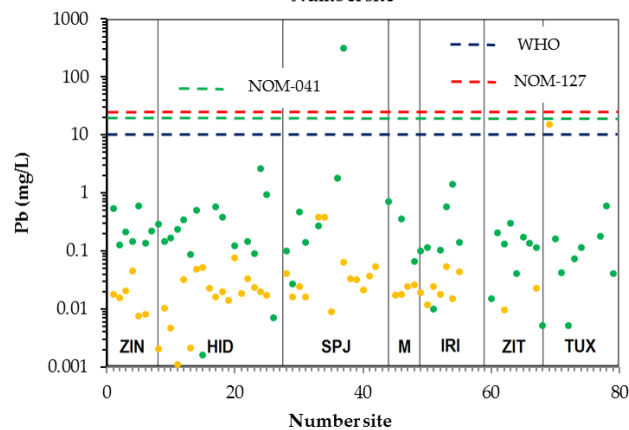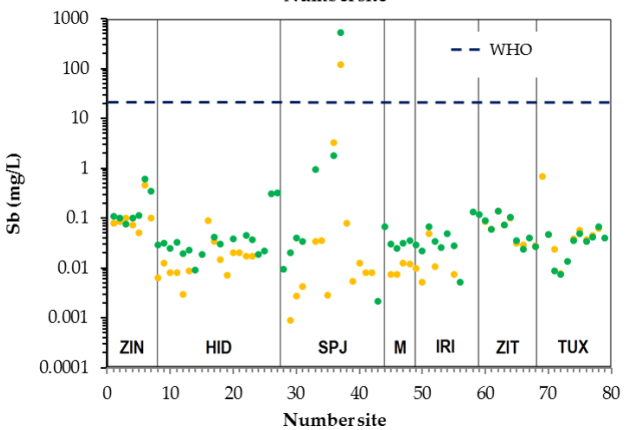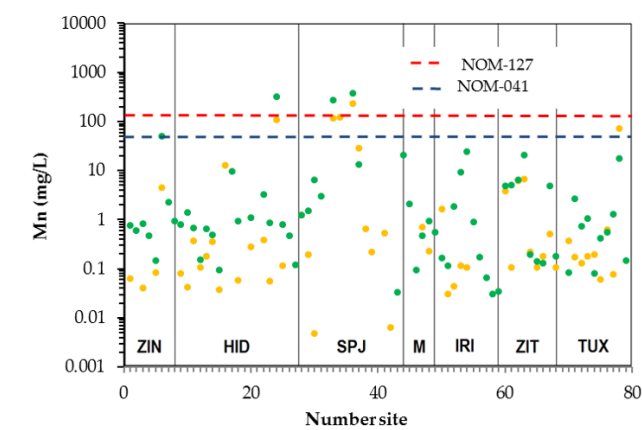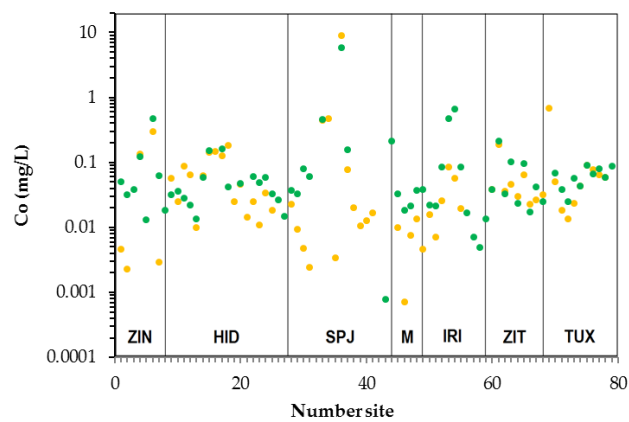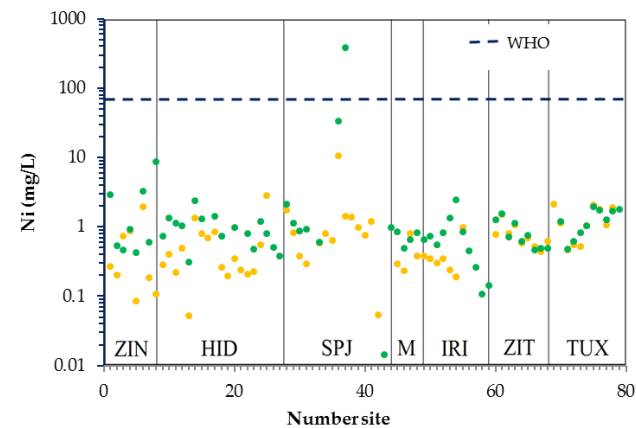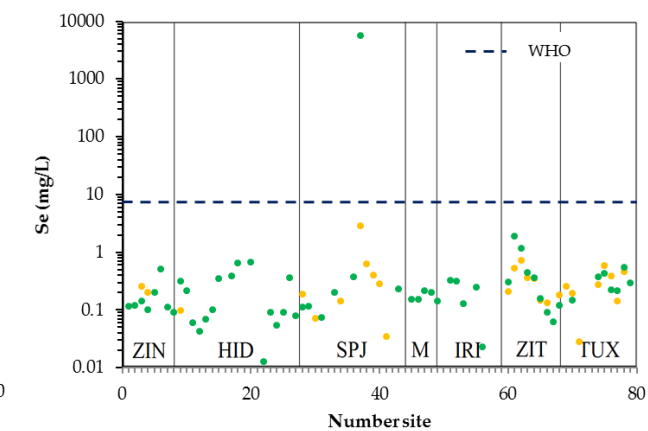

Supplement: s1 [file s1]
